# Supplementary material for: Single-Cell Analysis of the Neonatal Immune System Across the Gestational Age Continuum
Source: Front Immunol. 2021 Aug 23;12:714090. doi: 10.3389/fimmu.2021.714090 (PMC8420969; doi:10.3389/fimmu.2021.714090)
Supplement: Supplementary file 1 [file DataSheet_1.csv]

	name	p.value	FDR	r	count in bootstrap	median coeff in bootstrap	sign
1	frequency_BcellCD24pos_	0.914068113	0.942518783	0.016550731	102	0.066659353	increasing with GA
2	frequency_Bcells_	0.875299198	0.922051084	0.024067796	13	-0.032587625	increasing with GA
3	frequency_CD4NKT_	3.20E-07	2.71E-05	-0.677459015	619	-0.444780508	decreasing with GA
4	frequency_CD4T_	0.025500761	0.092690481	-0.332794982	3	0.072305209	decreasing with GA
5	frequency_CD4T_CD161pos_	0.001730532	0.012537531	-0.454057113	441	-0.33699225	decreasing with GA
6	frequency_CD4T_CM_	0.447750826	0.630191232	0.116052936	179	0.152414508	increasing with GA
7	frequency_CD4T_CRTH2pos_	0.468793921	0.646401178	-0.110777803	13	-0.063232509	decreasing with GA
8	frequency_CD4T_EM_	0.157213842	0.328572463	-0.214434175	54	-0.109342984	decreasing with GA
9	frequency_CD4T_EMRA_	0.514091217	0.683641624	-0.099831901	111	0.088544538	decreasing with GA
10	frequency_CD4T_FoxP3pos_	1.56E-05	0.000251842	-0.596024142	44	-0.279120988	decreasing with GA
11	frequency_CD4T_Tbetpos_	0.102162354	0.248708456	-0.246810307	25	-0.118479645	decreasing with GA
12	frequency_CD4Tnaive_	0.005298756	0.030339649	-0.408822844	60	-0.095759454	decreasing with GA
13	frequency_CD4Treg_FoxP3pos_CD25pos_	1.54E-06	5.57E-05	-0.647390755	24	-0.165317449	decreasing with GA
14	frequency_CD56brightCD16negNK_	0.513532711	0.683641624	-0.099963779	120	-0.201132144	decreasing with GA
15	frequency_CD56dimCD16posNK_	0.741775423	0.828082627	0.050509403	27	0.076319551	increasing with GA
16	frequency_CD8NKT_	1.38E-05	0.00022674	-0.598925466	73	-0.194071302	decreasing with GA
17	frequency_CD8T_	0.012280942	0.054719095	-0.370314369	6	-0.059202411	decreasing with GA
18	frequency_CD8T_CD161pos_	2.88E-05	0.000408965	-0.580792195	196	-0.240960953	decreasing with GA
19	frequency_CD8T_CM_	0.636472897	0.743361338	0.072401207	59	0.106373038	increasing with GA
20	frequency_CD8T_EM_	0.846911149	0.908318604	-0.029606687	49	0.000838947	decreasing with GA
21	frequency_CD8T_EMRA_	0.000523228	0.005050095	-0.496455998	73	-0.153421755	decreasing with GA
22	frequency_CD8Tnaive_	0.139089092	0.305422439	-0.223995355	6	0.002593448	decreasing with GA
23	frequency_cMC_	9.55E-06	0.000164395	0.607695375	4	0.174353832	increasing with GA
24	frequency_DC_	0.32726608	0.5140684	0.149418155	219	-0.290571508	increasing with GA
25	frequency_gdT_	0.469326671	0.646401178	0.110645924	50	-0.07194945	increasing with GA
26	frequency_Granulocytes_	8.48E-10	9.03E-07	0.766345014	974	0.983762701	increasing with GA
27	frequency_HLADRhighmDC_	0.017482866	0.069564354	0.352708611	2	-0.122360662	increasing with GA
28	frequency_HLADRlowmDC_	0.134956619	0.300060123	0.226303226	41	-0.12098253	increasing with GA
29	frequency_intMC_	0.776188321	0.854091604	0.04358579	198	-0.239826608	increasing with GA
30	frequency_mDC_	0.04239395	0.133578569	0.303913627	9	-0.073738948	increasing with GA
31	frequency_ncMC_	0.306743001	0.493909841	0.155814255	3	-0.019397788	increasing with GA
32	frequency_NK_	0.804363684	0.876285889	-0.037980961	16	-0.045470433	decreasing with GA
33	frequency_NKT_	0.000155491	0.001689773	-0.534502898	17	-0.252762129	decreasing with GA
34	frequency_pDC_	0.00669629	0.035304698	0.398536333	108	0.156237197	increasing with GA
35	ratio_IFNa_BcellCD24pos_IkB	0.648452128	0.752289233	-0.072442652	3	-0.040687719	decreasing with GA
36	ratio_IFNa_BcellCD24pos_pMAPKAPK2	0.077327371	0.203845669	-0.275574121	1	-0.017877389	decreasing with GA
37	ratio_IFNa_BcellCD24pos_pNFkB	0.986575655	0.989362592	0.002677052	1	0.293223088	increasing with GA
38	ratio_IFNa_BcellCD24pos_pS6	0.45348241	0.632144983	0.118844889	23	0.030070456	increasing with GA
39	ratio_IFNa_BcellCD24pos_pSTAT1	0.032585011	0.111121847	0.326543123	7	0.057236738	increasing with GA
40	ratio_IFNa_BcellCD24pos_pSTAT3	0.000177301	0.001888258	0.541441757	1	0.109257715	increasing with GA
41	ratio_IFNa_Bcells_IkB	0.948774981	0.960499387	-0.010221472	3	-0.058155972	decreasing with GA
42	ratio_IFNa_Bcells_pCREB	0.681532515	0.781304767	0.065222724	2	0.442365618	increasing with GA
43	ratio_IFNa_Bcells_pMAPKAPK2	0.08953745	0.227583257	-0.265271527	9	-0.527520112	decreasing with GA
44	ratio_IFNa_Bcells_pNFkB	0.257690725	0.444078677	0.178632386	1	0.112755226	increasing with GA
45	ratio_IFNa_Bcells_pS6	0.273375426	0.461402265	-0.17295379	12	0.043613584	decreasing with GA
46	ratio_IFNa_CD4NKT_IkB	0.021379927	0.081611548	-0.362859604	248	-0.137178749	decreasing with GA
47	ratio_IFNa_CD4NKT_pCREB	0.243544925	0.430465835	-0.188709538	50	-0.163863853	decreasing with GA
48	ratio_IFNa_CD4NKT_pMAPKAPK2	0.862056103	0.913978469	0.028367486	84	-0.064342629	increasing with GA
49	ratio_IFNa_CD4NKT_pNFkB	0.865223763	0.915057902	-0.027709962	97	0.116693632	decreasing with GA
50	ratio_IFNa_CD4NKT_pP38	0.563092117	0.693005668	0.094213871	20	-0.011906104	increasing with GA
51	ratio_IFNa_CD4NKT_pS6	0.149362986	0.320708831	0.232200088	30	0.014819281	increasing with GA
52	ratio_IFNa_CD4NKT_pSTAT1	0.003697223	0.023331839	0.443310988	73	0.147510552	increasing with GA
53	ratio_IFNa_CD4NKT_pSTAT6	0.798722412	0.872450635	0.041078	24	0.092031123	increasing with GA
54	ratio_IFNa_CD4T_CD161pos_IkB	0.013486806	0.058388001	-0.378356697	60	-0.325434576	decreasing with GA
55	ratio_IFNa_CD4T_CD161pos_pCREB	0.392309685	0.574704008	-0.135475061	14	-0.157261531	decreasing with GA
56	ratio_IFNa_CD4T_CD161pos_pMAPKAPK2	0.532569307	0.68527582	-0.099050928	17	-0.362625382	decreasing with GA
57	ratio_IFNa_CD4T_CD161pos_pS6	0.578681194	0.702731439	-0.088180474	20	-0.11290864	decreasing with GA
58	ratio_IFNa_CD4T_CD161pos_pSTAT3	0.238398201	0.425240432	0.183673572	1	-0.051092061	increasing with GA
59	ratio_IFNa_CD4T_CRTH2pos_IkB	0.314879524	0.500517453	-0.160910638	20	-0.185785362	decreasing with GA
60	ratio_IFNa_CD4T_CRTH2pos_pCREB	0.420584421	0.6039845	-0.129251797	10	-0.066415717	decreasing with GA
61	ratio_IFNa_CD4T_CRTH2pos_pMAPKAPK2	0.53267526	0.68527582	0.100296604	13	-0.148214862	increasing with GA
62	ratio_IFNa_CD4T_CRTH2pos_pNFkB	0.197269407	0.373165042	-0.20556443	23	-0.050095564	decreasing with GA
63	ratio_IFNa_CD4T_CRTH2pos_pP38	0.992659593	0.993592544	-0.001482645	19	-0.103513858	decreasing with GA
64	ratio_IFNa_CD4T_CRTH2pos_pS6	0.915950021	0.942518783	0.017006815	24	0.040607663	increasing with GA
65	ratio_IFNa_CD4T_CRTH2pos_pSTAT1	0.219548156	0.400374634	0.193485696	3	0.11988228	increasing with GA
66	ratio_IFNa_CD4T_CRTH2pos_pSTAT5	0.735530712	0.822836354	-0.053703288	1	-0.116786297	decreasing with GA
67	ratio_IFNa_CD4T_CRTH2pos_pSTAT6	0.575178608	0.700074535	-0.088991702	2	0.052326595	decreasing with GA
68	ratio_IFNa_CD4T_EM_IkB	0.280982863	0.467934552	-0.170276738	2	-0.030037395	decreasing with GA
69	ratio_IFNa_CD4T_EM_pCREB	0.242829245	0.430465835	0.184229858	9	0.145785114	increasing with GA
70	ratio_IFNa_CD4T_EM_pMAPKAPK2	0.40735185	0.591048665	0.131256676	8	0.181647611	increasing with GA
71	ratio_IFNa_CD4T_EM_pS6	0.136735781	0.302123666	0.233471393	1	-0.008871711	increasing with GA
72	ratio_IFNa_CD4T_EMRA_IkB	0.813710052	0.880692281	-0.037478729	7	0.040902512	decreasing with GA
73	ratio_IFNa_CD4T_EMRA_pMAPKAPK2	0.212937856	0.391673258	-0.196236031	1	-0.126087676	decreasing with GA
74	ratio_IFNa_CD4T_EMRA_pNFkB	0.054193058	0.161668367	0.299261976	24	0.097867076	increasing with GA
75	ratio_IFNa_CD4T_EMRA_pP38	0.013237416	0.057542236	-0.379300556	34	-0.169118993	decreasing with GA
76	ratio_IFNa_CD4T_EMRA_pS6	0.916734965	0.942518783	-0.016632868	31	0.051794224	decreasing with GA
77	ratio_IFNa_CD4T_EMRA_pSTAT5	0.05717568	0.167285988	-0.292290413	4	-0.22020854	decreasing with GA
78	ratio_IFNa_CD4T_EMRA_pSTAT6	0.039767471	0.126803464	-0.314814991	1	-0.254767557	decreasing with GA
79	ratio_IFNa_CD4T_FoxP3pos_IkB	0.109693229	0.259031682	-0.250426056	2	-0.313189562	decreasing with GA
80	ratio_IFNa_CD4T_FoxP3pos_pMAPKAPK2	0.012914088	0.05683266	-0.380547013	29	-0.490862017	decreasing with GA
81	ratio_IFNa_CD4T_FoxP3pos_pS6	0.313032021	0.499070512	-0.159487407	5	-0.050911552	decreasing with GA
82	ratio_IFNa_CD4T_FoxP3pos_pSTAT1	0.037746826	0.12293691	0.317926013	1	0.607195992	increasing with GA
83	ratio_IFNa_CD4T_FoxP3pos_pSTAT3	0.345578037	0.534166342	0.147392373	1	-0.002870948	increasing with GA
84	ratio_IFNa_CD4T_Tbetpos_pCREB	0.823626518	0.888715544	-0.03545066	13	0.104063523	decreasing with GA
85	ratio_IFNa_CD4T_Tbetpos_pNFkB	0.866357442	0.915347893	-0.026770521	5	-0.410392936	decreasing with GA
86	ratio_IFNa_CD4T_Tbetpos_pP38	0.040645364	0.129215859	-0.31724153	30	-0.13936468	decreasing with GA
87	ratio_IFNa_CD4T_Tbetpos_pS6	0.069494683	0.187847304	-0.282875172	310	-0.206726759	decreasing with GA
88	ratio_IFNa_CD4T_Tbetpos_pSTAT5	0.190969037	0.367199406	-0.203325889	1	-2.034411974	decreasing with GA
89	ratio_IFNa_CD4T_Tbetpos_pSTAT6	0.039517385	0.126803464	-0.31519292	1	-1.430272003	decreasing with GA
90	ratio_IFNa_CD4Treg_FoxP3pos_CD25pos_pCREB	0.451002334	0.63116621	-0.119493871	3	0.063369285	decreasing with GA
91	ratio_IFNa_CD4Treg_FoxP3pos_CD25pos_pMAPKAPK2	0.007129992	0.036683291	-0.409183358	6	-0.494928341	decreasing with GA
92	ratio_IFNa_CD4Treg_FoxP3pos_CD25pos_pS6	0.963398845	0.973804078	0.007301051	1	0.005986467	increasing with GA
93	ratio_IFNa_CD56brightCD16negNK_IkB	0.132439253	0.295697703	-0.235986199	8	-0.030590967	decreasing with GA
94	ratio_IFNa_CD56brightCD16negNK_pCREB	0.56264983	0.693005668	-0.091912122	8	-0.047592841	decreasing with GA
95	ratio_IFNa_CD56brightCD16negNK_pMAPKAPK2	0.109455737	0.259031682	-0.250588301	31	-0.241106546	decreasing with GA
96	ratio_IFNa_CD56brightCD16negNK_pNFkB	0.188344579	0.365902147	0.207025363	29	0.080331856	increasing with GA
97	ratio_IFNa_CD56brightCD16negNK_pSTAT1	0.004815594	0.028651439	0.422059442	1	0.556153088	increasing with GA
98	ratio_IFNa_CD56brightCD16negNK_pSTAT3	3.88E-06	9.61E-05	0.63963146	39	0.302636329	increasing with GA
99	ratio_IFNa_CD56brightCD16negNK_pSTAT5	0.015864985	0.065478424	0.365759842	1	0.056822511	increasing with GA
100	ratio_IFNa_CD56brightCD16negNK_pSTAT6	0.08530259	0.218382832	0.265497539	6	0.092357371	increasing with GA
101	ratio_IFNa_CD56dimCD16posNK_IkB	0.022818717	0.085570188	-0.350612703	8	-0.043652106	decreasing with GA
102	ratio_IFNa_CD56dimCD16posNK_pCREB	0.776301101	0.854091604	-0.045185395	1	0.000414254	decreasing with GA
103	ratio_IFNa_CD56dimCD16posNK_pNFkB	0.112452615	0.262919006	0.248560232	8	0.331209608	increasing with GA
104	ratio_IFNa_CD56dimCD16posNK_pP38	0.009277843	0.044354454	0.396787647	1	0.102932321	increasing with GA
105	ratio_IFNa_CD56dimCD16posNK_pS6	0.05821125	0.169849263	-0.294633449	10	-0.169816023	decreasing with GA
106	ratio_IFNa_CD56dimCD16posNK_pSTAT1	0.001163583	0.009247881	0.478757379	25	0.082790909	increasing with GA
107	ratio_IFNa_CD56dimCD16posNK_pSTAT3	2.19E-05	0.000319481	0.599108199	14	0.171116596	increasing with GA
108	ratio_IFNa_CD56dimCD16posNK_pSTAT5	0.006888209	0.036058038	0.406122676	4	0.19082019	increasing with GA
109	ratio_IFNa_CD56dimCD16posNK_pSTAT6	0.140886211	0.308732128	0.228303692	27	0.121507092	increasing with GA
110	ratio_IFNa_CD8NKT_IkB	0.399211535	0.580820061	-0.133528114	2	-0.063807068	decreasing with GA
111	ratio_IFNa_CD8NKT_pCREB	0.349703691	0.538200045	-0.147967971	7	-0.267432477	decreasing with GA
112	ratio_IFNa_CD8NKT_pNFkB	0.037681784	0.12293691	0.321814112	130	0.129068726	increasing with GA
113	ratio_IFNa_CD8NKT_pP38	0.014080964	0.060468654	0.376166382	1	0.250000016	increasing with GA
114	ratio_IFNa_CD8NKT_pS6	0.256420902	0.443325098	0.179102064	17	0.061625655	increasing with GA
115	ratio_IFNa_CD8NKT_pSTAT1	0.005424294	0.030728047	0.416843232	16	0.143782925	increasing with GA
116	ratio_IFNa_CD8NKT_pSTAT3	4.35E-05	0.000551466	0.581352584	10	0.467674174	increasing with GA
117	ratio_IFNa_CD8NKT_pSTAT5	0.026340505	0.095417135	0.338624528	1	0.176205602	increasing with GA
118	ratio_IFNa_CD8NKT_pSTAT6	0.223776783	0.4066933	0.189418095	10	0.174985188	increasing with GA
119	ratio_IFNa_CD8T_CD161pos_IkB	0.031959385	0.109795952	-0.331548847	32	-0.251178663	decreasing with GA
120	ratio_IFNa_CD8T_CD161pos_pCREB	0.266578229	0.453523665	-0.175387474	3	-0.3621601	decreasing with GA
121	ratio_IFNa_CD8T_CD161pos_pMAPKAPK2	0.195882386	0.37123325	-0.203618205	1	-0.501286909	decreasing with GA
122	ratio_IFNa_CD8T_CD161pos_pNFkB	0.104902391	0.253335707	0.25375209	1	0.076610033	increasing with GA
123	ratio_IFNa_CD8T_CD161pos_pSTAT5	0.162923977	0.334323768	0.216628995	1	0.000586645	increasing with GA
124	ratio_IFNa_CD8T_CD161pos_pSTAT6	0.62143786	0.732925051	0.077475478	3	-0.15328749	increasing with GA
125	ratio_IFNa_CD8T_CM_IkB	0.366230018	0.55089685	-0.143019481	8	-0.274905033	decreasing with GA
126	ratio_IFNa_CD8T_CM_pCREB	0.521477748	0.68527582	-0.101732102	5	0.111874461	decreasing with GA
127	ratio_IFNa_CD8T_CM_pMAPKAPK2	0.850732407	0.908756282	0.02993431	8	0.680414698	increasing with GA
128	ratio_IFNa_CD8T_CM_pNFkB	0.386044572	0.567626288	0.137259762	3	0.088518289	increasing with GA
129	ratio_IFNa_CD8T_CM_pS6	0.362103713	0.549345376	0.144242167	7	0.105905599	increasing with GA
130	ratio_IFNa_CD8T_CM_pSTAT6	0.032762685	0.111121847	-0.326228452	14	-0.135828215	decreasing with GA
131	ratio_IFNa_CD8T_EM_IkB	0.933356764	0.953044059	-0.013304138	44	-0.11525326	decreasing with GA
132	ratio_IFNa_CD8T_EM_pCREB	0.373414076	0.558594963	0.140910288	4	0.229511154	increasing with GA
133	ratio_IFNa_CD8T_EM_pMAPKAPK2	0.191012649	0.367199406	-0.205808521	25	-0.440772709	decreasing with GA
134	ratio_IFNa_CD8T_EM_pNFkB	0.979254592	0.985695237	-0.004137262	5	0.099359857	decreasing with GA
135	ratio_IFNa_CD8T_EM_pS6	0.622472243	0.733332897	-0.078215047	1	0.040902666	decreasing with GA
136	ratio_IFNa_CD8T_EM_pSTAT3	0.000125984	0.001427372	0.551625403	1	1.009471749	increasing with GA
137	ratio_IFNa_CD8T_EMRA_IkB	0.207394322	0.383740765	-0.198588592	4	-0.353970109	decreasing with GA
138	ratio_IFNa_CD8T_EMRA_pCREB	0.324379659	0.511041918	-0.155836882	20	-0.081820257	decreasing with GA
139	ratio_IFNa_CD8T_EMRA_pMAPKAPK2	0.101387395	0.248708456	-0.256266897	15	-0.078744368	decreasing with GA
140	ratio_IFNa_CD8T_EMRA_pNFkB	0.019803111	0.07669205	0.358319368	20	0.090442565	increasing with GA
141	ratio_IFNa_CD8T_EMRA_pP38	0.133522083	0.297491669	0.235346752	7	0.101271662	increasing with GA
142	ratio_IFNa_CD8T_EMRA_pS6	0.058523212	0.170292954	0.294284914	13	0.056124951	increasing with GA
143	ratio_IFNa_CD8T_EMRA_pSTAT1	0.006006869	0.032806746	0.412307397	14	0.108947548	increasing with GA
144	ratio_IFNa_CD8T_EMRA_pSTAT3	3.49E-05	0.000470328	0.587172912	1	0.030331257	increasing with GA
145	ratio_IFNa_CD8T_EMRA_pSTAT6	0.051249843	0.155501661	0.29924431	1	0.164197679	increasing with GA
146	ratio_IFNa_CD8Tnaive_IkB	0.015263989	0.063851344	-0.37202912	7	-0.313857063	decreasing with GA
147	ratio_IFNa_CD8Tnaive_pS6	0.288647944	0.475131468	-0.167626854	1	-0.284581162	decreasing with GA
148	ratio_IFNa_cMC_IkB	0.762249608	0.843862612	0.048105815	35	0.153970728	increasing with GA
149	ratio_IFNa_cMC_pCREB	0.082730839	0.214489748	-0.270868999	2	-0.109252368	decreasing with GA
150	ratio_IFNa_cMC_pNFkB	0.829987406	0.894672659	-0.034152695	1	0.013509217	decreasing with GA
151	ratio_IFNa_cMC_pP38	0.061541211	0.175244359	-0.290987451	3	-0.213997141	decreasing with GA
152	ratio_IFNa_cMC_pS6	0.303892529	0.491862529	-0.16248895	3	0.2339684	decreasing with GA
153	ratio_IFNa_cMC_pSTAT1	0.01808556	0.071337487	0.358957117	1	0.071042523	increasing with GA
154	ratio_IFNa_DC_IkB	0.566117306	0.693005668	0.091100894	27	0.044674889	increasing with GA
155	ratio_IFNa_DC_pCREB	0.246862404	0.431705189	-0.182688525	10	-0.078979248	decreasing with GA
156	ratio_IFNa_DC_pMAPKAPK2	0.273832589	0.461442574	-0.172791545	4	-0.114466062	decreasing with GA
157	ratio_IFNa_DC_pNFkB	0.454103584	0.63218342	0.118682643	64	0.138514841	increasing with GA
158	ratio_IFNa_DC_pS6	0.112573772	0.262919006	-0.248479109	29	-0.114010243	decreasing with GA
159	ratio_IFNa_DC_pSTAT1	0.00054066	0.005141101	0.505763898	54	0.070736922	increasing with GA
160	ratio_IFNa_DC_pSTAT3	0.014365798	0.061444076	0.370824093	5	0.294456577	increasing with GA
161	ratio_IFNa_gdT_IkB	0.09452274	0.23657803	-0.261377633	25	-0.32079987	decreasing with GA
162	ratio_IFNa_gdT_pCREB	0.033318036	0.11212261	-0.329115163	1	-0.144203332	decreasing with GA
163	ratio_IFNa_gdT_pMAPKAPK2	0.036227366	0.118714291	-0.324166673	43	-0.483845986	decreasing with GA
164	ratio_IFNa_gdT_pNFkB	0.039765939	0.126803464	0.3185692	12	0.170631708	increasing with GA
165	ratio_IFNa_gdT_pP38	0.117877682	0.27232046	-0.244990829	1	-0.315463779	decreasing with GA
166	ratio_IFNa_gdT_pS6	0.431713136	0.612216364	0.124609656	9	0.177303026	increasing with GA
167	ratio_IFNa_Granulocytes_IkB	0.914320684	0.942518783	0.017116909	11	-0.126592404	increasing with GA
168	ratio_IFNa_Granulocytes_pCREB	0.542735464	0.68527582	-0.096617244	3	-0.077246468	decreasing with GA
169	ratio_IFNa_Granulocytes_pNFkB	0.205318188	0.382940996	-0.199480943	20	-0.126848292	decreasing with GA
170	ratio_IFNa_Granulocytes_pS6	0.916343739	0.942518783	-0.016711295	9	-0.085047836	decreasing with GA
171	ratio_IFNa_Granulocytes_pSTAT1	0.125888499	0.284362988	0.237046119	50	0.089892146	increasing with GA
172	ratio_IFNa_Granulocytes_pSTAT5	0.002299477	0.016006165	0.452759135	28	0.171316953	increasing with GA
173	ratio_IFNa_intMC_IkB	0.064394914	0.180001531	0.287985908	33	-0.037000828	increasing with GA
174	ratio_IFNa_intMC_pNFkB	0.756028322	0.83871892	-0.04940378	3	0.053109761	decreasing with GA
175	ratio_IFNa_intMC_pS6	0.717121449	0.80818449	-0.057597182	3	0.055909353	decreasing with GA
176	ratio_IFNa_intMC_pSTAT1	0.044329891	0.138856864	0.308239024	10	0.125178151	increasing with GA
177	ratio_IFNa_intMC_pSTAT5	0.02447033	0.089865179	0.342706163	1	0.710561856	increasing with GA
178	ratio_IFNa_intMC_pSTAT6	0.761347536	0.843741026	0.04769466	1	0.073021189	increasing with GA
179	ratio_IFNa_mDC_IkB	0.14976851	0.320932522	0.229025114	2	0.078968443	increasing with GA
180	ratio_IFNa_mDC_pCREB	0.169799784	0.34379614	-0.218559381	2	-0.202917532	decreasing with GA
181	ratio_IFNa_mDC_pNFkB	0.319149981	0.50579573	0.159515207	16	0.051032177	increasing with GA
182	ratio_IFNa_mDC_pSTAT1	0.007793367	0.039336188	0.405046096	1	0.100888709	increasing with GA
183	ratio_IFNa_ncMC_IkB	0.029171923	0.10219769	0.336821828	32	0.249479089	increasing with GA
184	ratio_IFNa_ncMC_pCREB	0.379838617	0.563409648	-0.139044464	15	-0.08204711	decreasing with GA
185	ratio_IFNa_ncMC_pNFkB	0.618190444	0.729903352	0.079175844	140	0.155170563	increasing with GA
186	ratio_IFNa_ncMC_pS6	0.297090705	0.485278528	-0.164760389	89	-0.184750874	decreasing with GA
187	ratio_IFNa_ncMC_pSTAT1	0.462570179	0.640221627	0.11504598	6	0.011535454	increasing with GA
188	ratio_IFNa_ncMC_pSTAT5	0.265308045	0.452212214	0.173696242	1	0.040762875	increasing with GA
189	ratio_IFNa_ncMC_pSTAT6	0.916853952	0.942518783	-0.016402745	3	0.042611866	decreasing with GA
190	ratio_IFNa_NK_IkB	0.040951736	0.129802378	-0.316784499	9	-0.067898068	decreasing with GA
191	ratio_IFNa_NK_pCREB	0.538318731	0.68527582	-0.09767184	1	0.073231259	decreasing with GA
192	ratio_IFNa_NK_pMAPKAPK2	0.069328027	0.187847304	-0.283037418	4	-0.128934794	decreasing with GA
193	ratio_IFNa_NK_pP38	0.034620887	0.114506969	0.326856968	1	-0.031755885	increasing with GA
194	ratio_IFNa_NK_pSTAT1	0.001337015	0.010167915	0.473616766	61	0.135290214	increasing with GA
195	ratio_IFNa_NK_pSTAT3	2.10E-05	0.000316053	0.600166561	9	0.199434368	increasing with GA
196	ratio_IFNa_NK_pSTAT5	0.005088643	0.029772719	0.41965254	2	0.335357349	increasing with GA
197	ratio_IFNa_NK_pSTAT6	0.176799104	0.354308754	0.209857964	6	0.045879952	increasing with GA
198	ratio_IFNa_NKT_IkB	0.115140979	0.268326352	-0.24677553	9	-0.227901457	decreasing with GA
199	ratio_IFNa_NKT_pCREB	0.788850871	0.865217485	-0.042589465	1	-0.024093852	decreasing with GA
200	ratio_IFNa_NKT_pMAPKAPK2	0.00615447	0.032937237	-0.41591655	24	-0.404225853	decreasing with GA
201	ratio_IFNa_NKT_pS6	0.220765863	0.401907083	0.192985315	8	0.21711893	increasing with GA
202	ratio_IFNa_pDC_IkB	0.255407746	0.443325098	0.181754889	7	0.0591579	increasing with GA
203	ratio_IFNa_pDC_pCREB	0.907365098	0.940609696	-0.018751104	7	-0.011500382	decreasing with GA
204	ratio_IFNa_pDC_pMAPKAPK2	0.811722445	0.879434795	0.038374353	21	0.151232995	increasing with GA
205	ratio_IFNa_pDC_pNFkB	0.135330996	0.300265648	-0.237223271	49	-0.112083875	decreasing with GA
206	ratio_IFNa_pDC_pS6	0.52446927	0.68527582	0.102302536	5	-0.000385014	increasing with GA
207	ratio_IFNa_pDC_pSTAT1	0.011695903	0.052780241	0.385495503	4	0.296431871	increasing with GA
208	ratio_IL246_BcellCD24pos_IkB	0.300301307	0.488276171	0.161678095	7	0.126293556	increasing with GA
209	ratio_IL246_BcellCD24pos_pNFkB	0.154372732	0.327345896	0.221012973	9	0.018032194	increasing with GA
210	ratio_IL246_BcellCD24pos_pS6	0.419909971	0.6039845	0.12622834	19	-0.024907207	increasing with GA
211	ratio_IL246_BcellCD24pos_pSTAT5	0.015336071	0.063851344	0.367498316	3	1.123516984	increasing with GA
212	ratio_IL246_Bcells_IkB	0.280365317	0.467934552	0.168405234	1	0.001729187	increasing with GA
213	ratio_IL246_Bcells_pNFkB	0.127526652	0.287137176	0.236054554	18	0.09142843	increasing with GA
214	ratio_IL246_Bcells_pS6	0.352371248	0.539421294	0.145351555	10	-0.020054257	increasing with GA
215	ratio_IL246_Bcells_pSTAT3	0.10618499	0.254700483	0.249810997	2	0.338431385	increasing with GA
216	ratio_IL246_Bcells_pSTAT5	0.1792704	0.357872687	0.208692483	2	0.480008688	increasing with GA
217	ratio_IL246_CD4NKT_IkB	0.352046153	0.539421294	-0.149136689	412	-0.260604507	decreasing with GA
218	ratio_IL246_CD4NKT_pCREB	0.290775981	0.477159352	-0.169021581	72	-0.086798466	decreasing with GA
219	ratio_IL246_CD4NKT_pMAPKAPK2	0.862486724	0.913978469	0.02790862	17	-0.012466003	increasing with GA
220	ratio_IL246_CD4NKT_pNFkB	0.517384586	0.68527582	-0.104046824	4	0.047467329	decreasing with GA
221	ratio_IL246_CD4NKT_pS6	0.690502353	0.786508027	-0.064102612	17	0.031262377	decreasing with GA
222	ratio_IL246_CD4NKT_pSTAT3	0.398783154	0.580820061	-0.135356808	150	-0.16203568	decreasing with GA
223	ratio_IL246_CD4NKT_pSTAT5	0.15460562	0.327345896	-0.226408681	46	-0.133008031	decreasing with GA
224	ratio_IL246_CD4NKT_pSTAT6	0.670206243	0.771642863	-0.068550548	8	-0.224890196	decreasing with GA
225	ratio_IL246_CD4T_CD161pos_pNFkB	0.281461798	0.467934552	0.168027305	1	0.144675775	increasing with GA
226	ratio_IL246_CD4T_CRTH2pos_IkB	0.654489586	0.757642836	0.072029692	7	0.107611395	increasing with GA
227	ratio_IL246_CD4T_CRTH2pos_pCREB	0.807967614	0.876285889	0.039154155	17	-0.072867587	increasing with GA
228	ratio_IL246_CD4T_CRTH2pos_pMAPKAPK2	0.084134679	0.216957465	0.273032645	10	0.107344547	increasing with GA
229	ratio_IL246_CD4T_CRTH2pos_pNFkB	0.963746007	0.973804078	-0.007325053	21	-0.090783229	decreasing with GA
230	ratio_IL246_CD4T_CRTH2pos_pS6	0.695335142	0.790322227	0.063050527	32	-0.02853057	increasing with GA
231	ratio_IL246_CD4T_CRTH2pos_pSTAT1	0.980142024	0.985695237	0.004011339	16	-0.056019206	increasing with GA
232	ratio_IL246_CD4T_CRTH2pos_pSTAT3	0.726058391	0.81394967	0.056420352	20	-0.147369887	increasing with GA
233	ratio_IL246_CD4T_CRTH2pos_pSTAT5	0.306772952	0.493909841	-0.163592859	20	-0.226010689	decreasing with GA
234	ratio_IL246_CD4T_CRTH2pos_pSTAT6	0.036157411	0.118714291	-0.328232155	6	0.079048849	decreasing with GA
235	ratio_IL246_CD4T_EM_IkB	0.104663639	0.253333582	0.250869377	2	0.086634201	increasing with GA
236	ratio_IL246_CD4T_EM_pCREB	0.012968978	0.056839346	0.375963929	1	0.508205804	increasing with GA
237	ratio_IL246_CD4T_EM_pNFkB	0.258814509	0.44493348	0.176039403	16	0.057728852	increasing with GA
238	ratio_IL246_CD4T_EM_pS6	0.271051002	0.458933732	0.171655425	4	0.288485683	increasing with GA
239	ratio_IL246_CD4T_EM_pSTAT5	0.083067805	0.214726242	-0.267347088	2	-1.057297566	decreasing with GA
240	ratio_IL246_CD4T_EM_pSTAT6	0.006685284	0.035304698	-0.407483221	1	-0.0404907	decreasing with GA
241	ratio_IL246_CD4T_EMRA_pMAPKAPK2	0.12602754	0.284362988	0.236961584	6	0.116213133	increasing with GA
242	ratio_IL246_CD4T_EMRA_pNFkB	0.375071332	0.559455137	0.138700002	5	0.185785097	increasing with GA
243	ratio_IL246_CD4T_EMRA_pS6	0.600375003	0.71789989	0.08217421	28	0.018197602	increasing with GA
244	ratio_IL246_CD4T_EMRA_pSTAT3	0.900076565	0.937029855	0.019727902	1	-0.149607558	increasing with GA
245	ratio_IL246_CD4T_EMRA_pSTAT5	0.034288229	0.113760012	-0.323582948	58	-0.336386475	decreasing with GA
246	ratio_IL246_CD4T_FoxP3pos_pSTAT1	0.509818132	0.682963913	-0.103289249	2	-0.581202895	decreasing with GA
247	ratio_IL246_CD4T_Tbetpos_IkB	0.105313484	0.253753077	0.250415862	1	0.156747994	increasing with GA
248	ratio_IL246_CD4T_Tbetpos_pNFkB	0.381675413	0.564561548	0.136810356	11	0.134090416	increasing with GA
249	ratio_IL246_CD4T_Tbetpos_pSTAT3	0.584714397	0.708442358	0.085714334	2	-0.141901298	increasing with GA
250	ratio_IL246_CD4T_Tbetpos_pSTAT5	0.010585372	0.04909146	-0.385941259	11	-0.498312655	decreasing with GA
251	ratio_IL246_CD4T_Tbetpos_pSTAT6	0.011125737	0.050853692	-0.383522513	1	-0.670527021	decreasing with GA
252	ratio_IL246_CD4Tnaive_pS6	0.100553215	0.247319109	0.253789013	2	0.091378633	increasing with GA
253	ratio_IL246_CD4Tnaive_pSTAT5	0.075826129	0.200384187	-0.273620713	11	-0.370409636	decreasing with GA
254	ratio_IL246_CD4Treg_FoxP3pos_CD25pos_pCREB	0.007096439	0.036683291	0.404762131	3	0.10387804	increasing with GA
255	ratio_IL246_CD4Treg_FoxP3pos_CD25pos_pNFkB	0.048714419	0.14908292	0.302418915	4	0.150610981	increasing with GA
256	ratio_IL246_CD4Treg_FoxP3pos_CD25pos_pSTAT1	0.856250915	0.911028006	0.028457901	4	1.136733612	increasing with GA
257	ratio_IL246_CD4Treg_FoxP3pos_CD25pos_pSTAT5	0.899695661	0.937029855	0.019803488	2	-1.373754357	increasing with GA
258	ratio_IL246_CD4Treg_FoxP3pos_CD25pos_pSTAT6	0.002010367	0.01433021	-0.458050143	3	-0.919940503	decreasing with GA
259	ratio_IL246_CD56brightCD16negNK_IkB	0.165646445	0.337930738	0.21526845	2	0.270647543	increasing with GA
260	ratio_IL246_CD56brightCD16negNK_pCREB	0.805755597	0.876285889	-0.03862436	7	0.001800751	decreasing with GA
261	ratio_IL246_CD56brightCD16negNK_pMAPKAPK2	0.557420795	0.690294357	-0.091987958	1	-0.110773685	decreasing with GA
262	ratio_IL246_CD56brightCD16negNK_pNFkB	0.299614854	0.487904923	0.161904853	22	0.108280214	increasing with GA
263	ratio_IL246_CD56brightCD16negNK_pS6	0.195899612	0.37123325	-0.201133899	7	0.04860048	decreasing with GA
264	ratio_IL246_CD56brightCD16negNK_pSTAT3	0.066864994	0.184008318	0.28207263	4	0.058227926	increasing with GA
265	ratio_IL246_CD56brightCD16negNK_pSTAT5	0.601776187	0.718034333	-0.081859456	1	-0.130495834	decreasing with GA
266	ratio_IL246_CD56brightCD16negNK_pSTAT6	0.678067534	0.779009626	0.065154987	1	0.046932735	increasing with GA
267	ratio_IL246_CD56dimCD16posNK_pNFkB	0.165950963	0.337930738	0.215117278	59	0.175328207	increasing with GA
268	ratio_IL246_CD56dimCD16posNK_pS6	0.863899722	0.91456581	0.026928897	3	-0.04589439	increasing with GA
269	ratio_IL246_CD56dimCD16posNK_pSTAT3	0.265132045	0.452212214	0.173759246	1	0.06517965	increasing with GA
270	ratio_IL246_CD56dimCD16posNK_pSTAT5	0.856816827	0.911028006	-0.028344687	5	-0.067343425	decreasing with GA
271	ratio_IL246_CD8NKT_pCREB	0.579406688	0.702811073	0.086923707	1	-0.024945164	increasing with GA
272	ratio_IL246_CD8NKT_pNFkB	0.35516202	0.540353644	0.144520111	54	0.11777909	increasing with GA
273	ratio_IL246_CD8NKT_pS6	0.501898287	0.680053023	-0.105219369	10	-0.169138902	decreasing with GA
274	ratio_IL246_CD8NKT_pSTAT3	0.193300307	0.370260479	0.202284548	2	0.960718935	increasing with GA
275	ratio_IL246_CD8NKT_pSTAT5	0.528518361	0.68527582	-0.098790683	38	-0.087694478	decreasing with GA
276	ratio_IL246_CD8NKT_pSTAT6	0.185796375	0.362405017	-0.205669049	2	-0.364094112	decreasing with GA
277	ratio_IL246_CD8T_CD161pos_pNFkB	0.150222376	0.321258695	0.223204962	4	0.202355557	increasing with GA
278	ratio_IL246_CD8T_CD161pos_pS6	0.482579448	0.658906554	0.109993997	2	-0.318477614	increasing with GA
279	ratio_IL246_CD8T_CD161pos_pSTAT5	0.667149487	0.769787869	-0.067498148	15	-0.123786508	decreasing with GA
280	ratio_IL246_CD8T_CD161pos_pSTAT6	0.047485275	0.146584979	-0.304006217	1	-0.130066447	decreasing with GA
281	ratio_IL246_CD8T_CM_IkB	0.462883242	0.640221627	0.114966051	2	0.505807841	increasing with GA
282	ratio_IL246_CD8T_CM_pCREB	0.053954749	0.161409571	0.295994119	5	-0.147782824	increasing with GA
283	ratio_IL246_CD8T_CM_pMAPKAPK2	0.056439536	0.166044492	0.293121857	9	0.168144175	increasing with GA
284	ratio_IL246_CD8T_CM_pNFkB	0.107722642	0.257230076	0.248752974	4	0.09714908	increasing with GA
285	ratio_IL246_CD8T_CM_pS6	0.188385351	0.365902147	0.204490559	8	0.087695269	increasing with GA
286	ratio_IL246_CD8T_CM_pSTAT3	0.02484203	0.090916707	0.341874719	1	0.000741602	increasing with GA
287	ratio_IL246_CD8T_CM_pSTAT5	0.310953201	0.496499489	-0.158201147	2	-0.021621689	decreasing with GA
288	ratio_IL246_CD8T_EM_IkB	0.245345316	0.430465835	0.181028068	2	-0.123965926	increasing with GA
289	ratio_IL246_CD8T_EM_pCREB	0.034066782	0.113733928	0.323960877	14	0.37025381	increasing with GA
290	ratio_IL246_CD8T_EM_pMAPKAPK2	0.146293439	0.316029436	0.225321366	2	0.024422413	increasing with GA
291	ratio_IL246_CD8T_EM_pNFkB	0.30282693	0.490883837	0.160846651	26	0.196529381	increasing with GA
292	ratio_IL246_CD8T_EM_pSTAT5	0.539670335	0.68527582	-0.096145179	3	-0.043163535	decreasing with GA
293	ratio_IL246_CD8T_EMRA_pCREB	0.301447637	0.489392886	0.161300166	1	0.166140891	increasing with GA
294	ratio_IL246_CD8T_EMRA_pNFkB	0.141896524	0.310307594	0.227740112	48	0.123903373	increasing with GA
295	ratio_IL246_CD8T_EMRA_pS6	0.780345456	0.857655223	0.043797279	6	-0.036412237	increasing with GA
296	ratio_IL246_CD8T_EMRA_pSTAT3	0.082774917	0.214489748	0.267592353	2	0.033229183	increasing with GA
297	ratio_IL246_CD8T_EMRA_pSTAT5	0.846249751	0.908318604	-0.03046109	5	-0.264670842	decreasing with GA
298	ratio_IL246_CD8T_IkB	0.04538079	0.141731792	0.306802893	1	0.291378535	increasing with GA
299	ratio_IL246_CD8T_pCREB	0.008504671	0.041774153	0.396372104	2	0.471863506	increasing with GA
300	ratio_IL246_CD8T_pSTAT5	0.416271039	0.600795231	-0.127210956	1	-0.022941716	decreasing with GA
301	ratio_IL246_CD8Tnaive_IkB	0.06586647	0.183094609	0.283068942	2	0.060504274	increasing with GA
302	ratio_IL246_CD8Tnaive_pSTAT1	0.754754526	0.838178905	0.049053729	12	1.645217244	increasing with GA
303	ratio_IL246_CD8Tnaive_pSTAT5	0.289439084	0.475698494	-0.165306215	7	-0.061901108	decreasing with GA
304	ratio_IL246_cMC_IkB	0.161425608	0.333174946	0.217384853	5	0.02797313	increasing with GA
305	ratio_IL246_cMC_pNFkB	0.135616837	0.300274285	0.231292647	13	0.065908594	increasing with GA
306	ratio_IL246_cMC_pP38	0.202671041	0.380536976	-0.198186052	26	-0.157238094	decreasing with GA
307	ratio_IL246_cMC_pS6	0.927554655	0.95076584	-0.014285722	153	0.213913009	decreasing with GA
308	ratio_IL246_cMC_pSTAT1	0.155507312	0.327951063	-0.220421272	1	-2.154151797	decreasing with GA
309	ratio_IL246_DC_IkB	0.699740736	0.793635659	0.060544252	19	-0.257794612	increasing with GA
310	ratio_IL246_DC_pCREB	0.35363812	0.539421294	0.144973626	1	-0.118143893	increasing with GA
311	ratio_IL246_DC_pMAPKAPK2	0.654206719	0.757642836	0.070294824	4	0.175246934	increasing with GA
312	ratio_IL246_DC_pNFkB	0.052180718	0.15672977	0.298110522	36	0.088013588	increasing with GA
313	ratio_IL246_DC_pP38	0.238773501	0.425240432	-0.183529329	15	-0.192402383	decreasing with GA
314	ratio_IL246_DC_pS6	0.593720157	0.712436253	0.083673516	11	0.14507512	increasing with GA
315	ratio_IL246_DC_pSTAT6	0.244944694	0.430465835	-0.18117924	10	-0.369531997	decreasing with GA
316	ratio_IL246_gdT_pNFkB	0.39373444	0.575370754	0.133408994	6	0.020240021	increasing with GA
317	ratio_IL246_gdT_pSTAT3	0.175434484	0.353859328	0.210506543	1	0.055948019	increasing with GA
318	ratio_IL246_Granulocytes_IkB	0.832702785	0.896692079	-0.03318218	27	-0.062687445	decreasing with GA
319	ratio_IL246_Granulocytes_pCREB	0.190127908	0.366822866	-0.203703818	358	-0.245216592	decreasing with GA
320	ratio_IL246_Granulocytes_pMAPKAPK2	0.545449459	0.68527582	0.094784634	17	-0.089721887	increasing with GA
321	ratio_IL246_Granulocytes_pNFkB	0.881439978	0.925772758	0.023431608	6	0.049068719	increasing with GA
322	ratio_IL246_Granulocytes_pS6	0.874988448	0.922051084	-0.024716567	33	-0.064735653	decreasing with GA
323	ratio_IL246_Granulocytes_pSTAT3	0.364388978	0.550459852	-0.141799021	4	0.055870611	decreasing with GA
324	ratio_IL246_Granulocytes_pSTAT5	0.000283423	0.002930539	0.526908836	130	0.326751688	increasing with GA
325	ratio_IL246_Granulocytes_pSTAT6	0.975823075	0.984139749	-0.004761907	8	0.116817578	decreasing with GA
326	ratio_IL246_intMC_IkB	0.006086683	0.032838135	0.411716028	17	0.182285433	increasing with GA
327	ratio_IL246_intMC_pCREB	0.02374084	0.087791647	0.344369051	1	0.051724286	increasing with GA
328	ratio_IL246_intMC_pNFkB	0.048243176	0.148494169	0.303023601	26	0.182307355	increasing with GA
329	ratio_IL246_intMC_pP38	0.124665	0.282485585	-0.237793028	27	-0.225214394	decreasing with GA
330	ratio_IL246_intMC_pS6	0.749260359	0.835562599	0.050188993	170	0.232535163	increasing with GA
331	ratio_IL246_intMC_pSTAT1	0.257504691	0.444078677	-0.176516778	1	1.518197584	decreasing with GA
332	ratio_IL246_intMC_pSTAT3	0.646557907	0.75138476	-0.071957712	1	-0.726658353	decreasing with GA
333	ratio_IL246_intMC_pSTAT5	0.145323142	0.314934567	0.225850467	6	0.428476999	increasing with GA
334	ratio_IL246_mDC_IkB	0.117877682	0.27232046	0.244990829	6	0.06840346	increasing with GA
335	ratio_IL246_mDC_pNFkB	0.138284954	0.304284042	0.232579042	14	0.02039199	increasing with GA
336	ratio_IL246_mDC_pP38	0.236344953	0.423037605	-0.186744665	44	0.048507648	decreasing with GA
337	ratio_IL246_mDC_pS6	0.340430441	0.529282364	-0.150807269	12	0.078145166	decreasing with GA
338	ratio_IL246_mDC_pSTAT3	0.845935739	0.908318604	-0.030907783	6	-0.070665618	decreasing with GA
339	ratio_IL246_mDC_pSTAT5	0.518827238	0.68527582	0.102376962	1	0.093551916	increasing with GA
340	ratio_IL246_ncMC_pCREB	0.752551121	0.83747852	0.04950872	57	-0.130684715	increasing with GA
341	ratio_IL246_ncMC_pNFkB	0.028863199	0.101785783	0.333484692	3	-0.046526231	increasing with GA
342	ratio_IL246_ncMC_pS6	0.91342156	0.942518783	-0.017082398	6	-0.131942832	decreasing with GA
343	ratio_IL246_ncMC_pSTAT3	0.567872657	0.693960751	-0.089569211	10	-0.218058792	decreasing with GA
344	ratio_IL246_ncMC_pSTAT6	0.065341025	0.18216804	-0.283598042	25	-0.287322505	decreasing with GA
345	ratio_IL246_NK_pNFkB	0.23081603	0.416642495	0.18662142	1	0.140057421	increasing with GA
346	ratio_IL246_NK_pSTAT5	0.719126044	0.809586931	-0.056462617	2	-0.120773564	decreasing with GA
347	ratio_IL246_NKT_IkB	0.091031906	0.230830903	0.260922293	1	0.060533738	increasing with GA
348	ratio_IL246_NKT_pSTAT5	0.588376025	0.709474073	-0.08488289	8	-0.039313909	decreasing with GA
349	ratio_IL246_pDC_IkB	0.073328782	0.195727199	0.279224647	3	0.09865985	increasing with GA
350	ratio_IL246_pDC_pCREB	0.050018082	0.152633974	0.304372712	61	0.18432725	increasing with GA
351	ratio_IL246_pDC_pMAPKAPK2	0.732452015	0.820253834	0.05435227	11	-0.025076013	increasing with GA
352	ratio_IL246_pDC_pNFkB	0.206260077	0.38336297	0.199075329	26	0.143693559	increasing with GA
353	ratio_IL246_pDC_pS6	0.656570476	0.759226446	-0.070657951	64	-0.15840811	decreasing with GA
354	ratio_IL246_pDC_pSTAT1	0.587880514	0.709474073	-0.086060306	3	-0.168169909	decreasing with GA
355	ratio_LPS_BcellCD24pos_pMAPKAPK2	0.896013902	0.934627625	-0.020045507	1	0.248969016	decreasing with GA
356	ratio_LPS_BcellCD24pos_pS6	0.448530473	0.630191232	0.115855119	11	0.028295068	increasing with GA
357	ratio_LPS_Bcells_pS6	0.43461106	0.61468895	-0.119415834	20	-0.092779831	decreasing with GA
358	ratio_LPS_CD56brightCD16negNK_IkB	0.10835346	0.257952694	-0.2425902	61	-0.198305502	decreasing with GA
359	ratio_LPS_CD56brightCD16negNK_pCREB	0.588896789	0.709474073	-0.082753656	67	-0.201039769	decreasing with GA
360	ratio_LPS_CD56brightCD16negNK_pMAPKAPK2	0.90690893	0.940609696	-0.017935454	28	-0.172446782	decreasing with GA
361	ratio_LPS_CD56brightCD16negNK_pNFkB	0.450613161	0.63116621	0.115327605	1	0.036512027	increasing with GA
362	ratio_LPS_CD56brightCD16negNK_pS6	0.0702042	0.188331167	-0.27244236	181	-0.324858276	decreasing with GA
363	ratio_LPS_CD56dimCD16posNK_IkB	0.045893084	0.142912675	-0.299166007	121	-0.144961535	decreasing with GA
364	ratio_LPS_CD56dimCD16posNK_pCREB	0.856016772	0.911028006	0.027826329	4	0.385672485	increasing with GA
365	ratio_LPS_CD56dimCD16posNK_pMAPKAPK2	0.883440193	0.926959414	0.022485256	5	-0.232616752	increasing with GA
366	ratio_LPS_CD56dimCD16posNK_pNFkB	0.234607458	0.421343917	0.1808052	17	0.023132703	increasing with GA
367	ratio_LPS_CD56dimCD16posNK_pS6	0.573831579	0.699234132	-0.086107358	48	-0.180057285	decreasing with GA
368	ratio_LPS_cMC_pCREB	0.609914031	0.721731604	0.078137914	2	-0.154006891	increasing with GA
369	ratio_LPS_cMC_pMAPKAPK2	0.00150617	0.011217277	0.459266307	1	0.122933053	increasing with GA
370	ratio_LPS_cMC_pNFkB	0.283304972	0.468508999	0.163463198	5	-0.010364924	increasing with GA
371	ratio_LPS_cMC_pS6	0.907931237	0.940609696	-0.017737636	4	0.010464831	decreasing with GA
372	ratio_LPS_DC_IkB	0.602070103	0.718034333	-0.079852333	102	-0.165342324	decreasing with GA
373	ratio_LPS_DC_pCREB	0.042535268	0.133628497	0.303715809	5	0.050642503	increasing with GA
374	ratio_LPS_DC_pMAPKAPK2	0.003422931	0.021960372	0.427219872	36	0.075518837	increasing with GA
375	ratio_LPS_DC_pNFkB	0.372457996	0.558594963	0.136164383	23	0.131863812	increasing with GA
376	ratio_LPS_DC_pP38	0.003773846	0.023503777	0.423197582	69	0.14960765	increasing with GA
377	ratio_LPS_DC_pS6	0.947215332	0.959832853	0.010154632	47	0.110233699	increasing with GA
378	ratio_LPS_Granulocytes_IkB	0.807695359	0.876285889	-0.037321569	79	-0.10904483	decreasing with GA
379	ratio_LPS_Granulocytes_pCREB	0.31552605	0.50079768	-0.15304481	10	-0.049417931	decreasing with GA
380	ratio_LPS_Granulocytes_pMAPKAPK2	0.069272083	0.187847304	0.273317853	11	0.007590676	increasing with GA
381	ratio_LPS_Granulocytes_pNFkB	0.850618537	0.908756282	0.028881356	27	-0.039958388	increasing with GA
382	ratio_LPS_Granulocytes_pP38	0.015330113	0.063851344	0.359368467	44	0.074442148	increasing with GA
383	ratio_LPS_Granulocytes_pS6	0.538677623	0.68527582	-0.094095193	104	-0.091534854	decreasing with GA
384	ratio_LPS_intMC_IkB	0.061222009	0.175103713	0.281296492	2	0.217643379	increasing with GA
385	ratio_LPS_intMC_pCREB	0.18233317	0.359114763	0.202433247	1	0.063661551	increasing with GA
386	ratio_LPS_intMC_pMAPKAPK2	0.001727517	0.012537531	0.454123052	58	0.126895298	increasing with GA
387	ratio_LPS_intMC_pNFkB	0.451656483	0.63119313	0.115063849	3	0.016378858	increasing with GA
388	ratio_LPS_intMC_pP38	0.342820269	0.531852895	0.144736474	20	0.096026755	increasing with GA
389	ratio_LPS_mDC_IkB	0.151922537	0.323595005	0.217137681	5	-0.109630418	increasing with GA
390	ratio_LPS_mDC_pCREB	0.688078278	0.785695266	0.061521244	10	-0.232602764	increasing with GA
391	ratio_LPS_mDC_pMAPKAPK2	0.030684439	0.106100414	0.322574411	9	0.029189431	increasing with GA
392	ratio_LPS_mDC_pNFkB	0.535822947	0.68527582	-0.094754585	23	-0.125196028	decreasing with GA
393	ratio_LPS_mDC_pP38	0.795053389	0.871123311	0.039827258	1	0.042874121	increasing with GA
394	ratio_LPS_mDC_pS6	0.067749203	0.185961086	-0.274768514	14	-0.124243148	decreasing with GA
395	ratio_LPS_ncMC_IkB	0.039027575	0.126335463	0.308793125	2	0.664230886	increasing with GA
396	ratio_LPS_ncMC_pMAPKAPK2	0.207000438	0.383740765	0.191751101	2	-0.077242974	increasing with GA
397	ratio_LPS_ncMC_pNFkB	0.234607458	0.421343917	0.1808052	1	0.175558349	increasing with GA
398	ratio_LPS_ncMC_pP38	0.385682784	0.567626288	0.132471789	3	-0.127416579	increasing with GA
399	ratio_LPS_ncMC_pS6	0.122347228	0.2796133	-0.233688413	25	-0.117521307	decreasing with GA
400	ratio_LPS_NK_IkB	0.061730057	0.175313362	-0.280768979	19	-0.113881298	decreasing with GA
401	ratio_LPS_NK_pMAPKAPK2	0.984908906	0.988622041	0.002901323	4	-0.149707536	increasing with GA
402	ratio_LPS_NK_pNFkB	0.243750016	0.430465835	0.177376363	13	-0.076047394	increasing with GA
403	ratio_LPS_NK_pS6	0.549604254	0.68527582	-0.091586707	51	-0.112781425	decreasing with GA
404	ratio_LPS_pDC_IkB	0.788155459	0.865217485	-0.041691673	25	0.054511735	decreasing with GA
405	ratio_LPS_pDC_pCREB	0.892978186	0.932374282	0.020881109	35	0.239920598	increasing with GA
406	ratio_LPS_pDC_pMAPKAPK2	0.123984201	0.282143533	-0.235406282	319	-0.293202435	decreasing with GA
407	ratio_LPS_pDC_pNFkB	0.82266409	0.888577339	-0.034778333	28	0.085622723	decreasing with GA
408	ratio_LPS_pDC_pS6	0.173150255	0.349914651	-0.209093263	176	-0.295928651	decreasing with GA
409	Unstim_BcellCD24pos_IkB	0.039380601	0.126803464	-0.308265612	177	-0.266484089	decreasing with GA
410	Unstim_BcellCD24pos_pCREB	1.21E-05	0.00020058	-0.602222424	6	-0.248311896	decreasing with GA
411	Unstim_BcellCD24pos_PD1	0.000314074	0.003155554	0.513006729	153	0.124386217	increasing with GA
412	Unstim_BcellCD24pos_pNFkB	0.007978824	0.040082302	-0.390623633	8	-0.12657392	decreasing with GA
413	Unstim_BcellCD24pos_pS6	0.014484379	0.061703456	-0.362203852	4	-0.02955545	decreasing with GA
414	Unstim_Bcells_IkB	0.001748725	0.012583732	-0.453661478	511	-0.35747263	decreasing with GA
415	Unstim_Bcells_pCREB	7.87E-06	0.000147859	-0.612179239	2	-0.150191731	decreasing with GA
416	Unstim_Bcells_PD1	0.001627714	0.011955281	0.456364984	115	0.151127455	increasing with GA
417	Unstim_Bcells_pNFkB	0.011068002	0.050853692	-0.375325746	11	-0.051213579	decreasing with GA
418	Unstim_Bcells_pS6	0.016133072	0.066083545	-0.35679684	1	0.220982018	decreasing with GA
419	Unstim_CD4NKT_pCREB	0.084964935	0.218042544	-0.259668445	13	-0.154262064	decreasing with GA
420	Unstim_CD4NKT_PD1	0.282403235	0.467934552	0.163765548	86	0.082097398	increasing with GA
421	Unstim_CD4NKT_pERK1.2	0.224521217	0.4073511	0.18469561	54	0.055484782	increasing with GA
422	Unstim_CD4NKT_pMAPKAPK2	0.00068264	0.005803413	-0.487488271	21	-0.121568719	decreasing with GA
423	Unstim_CD4NKT_pNFkB	0.308403798	0.493909841	-0.155286741	37	-0.075318496	decreasing with GA
424	Unstim_CD4NKT_pP38	0.351194337	0.539421294	0.142270186	16	0.094951769	increasing with GA
425	Unstim_CD4NKT_pS6	0.071177993	0.190463724	-0.271537495	26	-0.135823719	decreasing with GA
426	Unstim_CD4NKT_pSTAT3	0.033817303	0.113256063	0.317074037	100	0.097733307	increasing with GA
427	Unstim_CD4NKT_pSTAT5	0.496920347	0.674165822	-0.103920129	9	-0.182320015	decreasing with GA
428	Unstim_CD4NKT_pSTAT6	0.697941205	0.792438575	-0.05947713	12	-0.069795529	decreasing with GA
429	Unstim_CD4T_CD161pos_PD1	0.373861825	0.558594963	0.135768748	99	0.094248573	increasing with GA
430	Unstim_CD4T_CD161pos_pNFkB	0.336193328	0.524225322	-0.14671465	2	0.021825326	decreasing with GA
431	Unstim_CD4T_CM_PD1	0.354042708	0.539421294	-0.141439516	25	-0.071403237	decreasing with GA
432	Unstim_CD4T_CM_pERK1.2	0.00086456	0.006975424	0.479311814	208	0.274436997	increasing with GA
433	Unstim_CD4T_CM_pNFkB	0.189710706	0.366682217	-0.199136288	1	0.355138034	decreasing with GA
434	Unstim_CD4T_CM_pSTAT3	0.306328696	0.493909841	0.155946133	17	0.078657533	increasing with GA
435	Unstim_CD4T_CM_pSTAT5	0.640790323	0.746653933	0.071478058	2	0.01292382	increasing with GA
436	Unstim_CD4T_CM_pSTAT6	0.006906892	0.036058038	0.397151611	8	0.61873675	increasing with GA
437	Unstim_CD4T_CRTH2pos_IkB	1.73E-05	0.000274237	-0.593584393	209	-0.302492489	decreasing with GA
438	Unstim_CD4T_CRTH2pos_pCREB	2.63E-06	7.77E-05	-0.636312974	101	-0.319424514	decreasing with GA
439	Unstim_CD4T_CRTH2pos_PD1	0.201467849	0.37970346	-0.194065365	128	-0.166779076	decreasing with GA
440	Unstim_CD4T_CRTH2pos_pERK1.2	0.024170171	0.089070009	0.335696306	239	0.158151819	increasing with GA
441	Unstim_CD4T_CRTH2pos_pNFkB	0.282518232	0.467934552	-0.163726955	6	-0.018452259	decreasing with GA
442	Unstim_CD4T_CRTH2pos_pS6	0.004411791	0.026848897	-0.416658565	9	-0.137618894	decreasing with GA
443	Unstim_CD4T_CRTH2pos_pSTAT3	0.079402829	0.208800031	0.264260511	27	0.116318815	increasing with GA
444	Unstim_CD4T_CRTH2pos_pSTAT5	0.902140157	0.937972522	0.018858602	9	-0.087960802	increasing with GA
445	Unstim_CD4T_CRTH2pos_pSTAT6	0.188665275	0.365902147	0.199597862	4	0.09745333	increasing with GA
446	Unstim_CD4T_EM_IkB	1.33E-06	5.49E-05	-0.650358017	24	-0.316622716	decreasing with GA
447	Unstim_CD4T_EM_PD1	0.18896355	0.365902147	0.199465984	14	0.096345773	increasing with GA
448	Unstim_CD4T_EM_pERK1.2	0.02510142	0.091551411	0.333652192	8	0.079619213	increasing with GA
449	Unstim_CD4T_EM_pMAPKAPK2	5.19E-07	3.14E-05	-0.668557228	2	-1.147940133	decreasing with GA
450	Unstim_CD4T_EM_pSTAT3	0.432517409	0.612541278	0.119956851	1	0.001613662	increasing with GA
451	Unstim_CD4T_EM_pSTAT6	0.461369428	0.640221627	0.112624099	1	0.096840905	increasing with GA
452	Unstim_CD4T_EMRA_IkB	3.31E-07	2.71E-05	-0.676865563	298	-0.523200963	decreasing with GA
453	Unstim_CD4T_EMRA_pCREB	8.89E-07	4.51E-05	-0.658281248	446	-0.356019084	decreasing with GA
454	Unstim_CD4T_EMRA_PD1	0.295992325	0.484227075	-0.159274044	104	-0.146374754	decreasing with GA
455	Unstim_CD4T_EMRA_pERK1.2	0.160240483	0.331371096	0.212917574	9	-0.021174117	increasing with GA
456	Unstim_CD4T_EMRA_pMAPKAPK2	7.91E-06	0.000147859	-0.61204736	4	-0.115545189	decreasing with GA
457	Unstim_CD4T_EMRA_pNFkB	0.03824274	0.12417231	-0.30998003	81	-0.134228282	decreasing with GA
458	Unstim_CD4T_EMRA_pS6	0.004915345	0.02892178	-0.412057731	12	-0.13495058	decreasing with GA
459	Unstim_CD4T_EMRA_pSTAT3	0.721515972	0.809709705	0.054631597	3	-0.152312208	increasing with GA
460	Unstim_CD4T_EMRA_pSTAT5	0.632781695	0.741377893	-0.073192477	19	-0.155756452	decreasing with GA
461	Unstim_CD4T_FoxP3pos_IkB	5.39E-06	0.000123131	-0.620751331	8	-0.351900486	decreasing with GA
462	Unstim_CD4T_FoxP3pos_pCREB	2.11E-05	0.000316053	-0.588658345	3	-0.001930815	decreasing with GA
463	Unstim_CD4T_FoxP3pos_PD1	0.479240547	0.65568817	0.108206175	2	-0.13408377	increasing with GA
464	Unstim_CD4T_FoxP3pos_pERK1.2	0.007281287	0.037281588	0.394777801	23	0.056251202	increasing with GA
465	Unstim_CD4T_FoxP3pos_pNFkB	0.035070343	0.115634413	-0.314991407	15	-0.244898196	decreasing with GA
466	Unstim_CD4T_FoxP3pos_pSTAT3	0.441753136	0.623961658	0.117581081	5	0.082111932	increasing with GA
467	Unstim_CD4T_IkB	2.92E-06	8.19E-05	-0.634071043	5	-0.303835473	decreasing with GA
468	Unstim_CD4T_pCREB	9.57E-06	0.000164395	-0.607649451	7	-0.013597932	decreasing with GA
469	Unstim_CD4T_PD1	0.462426174	0.640221627	-0.112360343	7	-0.073705397	decreasing with GA
470	Unstim_CD4T_pERK1.2	0.003702423	0.023331839	0.423988852	4	0.085844082	increasing with GA
471	Unstim_CD4T_pNFkB	0.068923615	0.187847304	-0.273647549	1	-0.179467628	decreasing with GA
472	Unstim_CD4T_Tbetpos_IkB	3.16E-06	8.56E-05	-0.632422563	7	-0.109830126	decreasing with GA
473	Unstim_CD4T_Tbetpos_pCREB	8.24E-06	0.00015084	-0.611124212	282	-0.417921249	decreasing with GA
474	Unstim_CD4T_Tbetpos_PD1	0.156431202	0.328426209	-0.21482981	493	-0.412981246	decreasing with GA
475	Unstim_CD4T_Tbetpos_pERK1.2	0.005115876	0.029772719	0.410339444	6	0.187154125	increasing with GA
476	Unstim_CD4T_Tbetpos_pMAPKAPK2	2.44E-07	2.59E-05	-0.682338514	2	-0.270005743	decreasing with GA
477	Unstim_CD4T_Tbetpos_pNFkB	0.401619094	0.583525696	-0.128119804	4	-0.031108173	decreasing with GA
478	Unstim_CD4T_Tbetpos_pS6	0.004103938	0.025118929	-0.419702806	4	-0.048412906	decreasing with GA
479	Unstim_CD4T_Tbetpos_pSTAT3	0.159654771	0.331070559	0.213209424	87	0.117984281	increasing with GA
480	Unstim_CD4T_Tbetpos_pSTAT5	0.148134553	0.318713735	0.219115856	1	0.935697387	increasing with GA
481	Unstim_CD4T_Tbetpos_pSTAT6	0.017505396	0.069564354	0.352642672	13	1.051050273	increasing with GA
482	Unstim_CD4Tnaive_IkB	3.21E-06	8.56E-05	-0.632026928	3	-0.333550901	decreasing with GA
483	Unstim_CD4Tnaive_pCREB	1.13E-05	0.000190481	-0.603818585	38	-0.183972794	decreasing with GA
484	Unstim_CD4Tnaive_PD1	0.345030964	0.534095896	-0.144081829	44	-0.173025233	decreasing with GA
485	Unstim_CD4Tnaive_pERK1.2	0.004001723	0.024634885	0.420757833	4	0.131715311	increasing with GA
486	Unstim_CD4Tnaive_pNFkB	0.060403558	0.173864297	-0.282153701	22	-0.274819614	decreasing with GA
487	Unstim_CD4Tnaive_pSTAT3	0.502922712	0.680575208	0.102482971	1	0.352180271	increasing with GA
488	Unstim_CD4Treg_FoxP3pos_CD25pos_IkB	7.73E-06	0.000147859	-0.612574874	3	-0.412398917	decreasing with GA
489	Unstim_CD4Treg_FoxP3pos_CD25pos_pCREB	4.22E-05	0.000541107	-0.570910604	1	-0.265404125	decreasing with GA
490	Unstim_CD4Treg_FoxP3pos_CD25pos_PD1	0.754176104	0.838178905	0.048003715	6	-0.11861884	increasing with GA
491	Unstim_CD4Treg_FoxP3pos_CD25pos_pERK1.2	0.001346175	0.010167915	0.463420475	27	0.121259495	increasing with GA
492	Unstim_CD4Treg_FoxP3pos_CD25pos_pNFkB	0.029864211	0.103939167	-0.324091012	43	-0.096089757	decreasing with GA
493	Unstim_CD4Treg_FoxP3pos_CD25pos_pSTAT5	0.282518232	0.467934552	-0.163726955	24	-0.518244365	decreasing with GA
494	Unstim_CD4Treg_FoxP3pos_CD25pos_pSTAT6	0.08888734	0.226471334	0.256569304	1	0.004151679	increasing with GA
495	Unstim_CD56brightCD16negNK_pCREB	0.000546499	0.005150633	-0.495005337	1	-0.000394885	decreasing with GA
496	Unstim_CD56brightCD16negNK_pMAPKAPK2	4.59E-07	3.14E-05	-0.670865098	1	-0.45862386	decreasing with GA
497	Unstim_CD56brightCD16negNK_pNFkB	0.013918118	0.060011316	-0.364182027	25	-0.140606815	decreasing with GA
498	Unstim_CD56brightCD16negNK_pS6	0.005269311	0.030334143	-0.409063911	14	-0.030553969	decreasing with GA
499	Unstim_CD56brightCD16negNK_pSTAT5	0.930454054	0.952449177	0.013386092	1	0.004264688	increasing with GA
500	Unstim_CD56dimCD16posNK_pCREB	0.001334149	0.010167915	-0.463750171	1	-0.407834626	decreasing with GA
501	Unstim_CD56dimCD16posNK_pMAPKAPK2	1.71E-07	2.29E-05	-0.688602735	75	-0.172782394	decreasing with GA
502	Unstim_CD56dimCD16posNK_pNFkB	0.005864325	0.03252868	-0.404404919	20	-0.207056636	decreasing with GA
503	Unstim_CD56dimCD16posNK_pSTAT5	0.111049608	0.261654497	-0.240809843	9	-0.272157233	decreasing with GA
504	Unstim_CD8NKT_IkB	3.67E-05	0.000482913	-0.574527974	1	-0.477140223	decreasing with GA
505	Unstim_CD8NKT_pCREB	0.001296308	0.010077137	-0.464805197	1	-0.103638189	decreasing with GA
506	Unstim_CD8NKT_pERK1.2	0.505468747	0.681423058	0.101876015	10	0.145590817	increasing with GA
507	Unstim_CD8NKT_pMAPKAPK2	1.24E-08	4.40E-06	-0.730342228	57	-0.137958004	decreasing with GA
508	Unstim_CD8NKT_pNFkB	0.002456688	0.016879823	-0.440539584	215	-0.253818573	decreasing with GA
509	Unstim_CD8NKT_pSTAT5	0.364793407	0.550459852	-0.138340375	6	-0.054903188	decreasing with GA
510	Unstim_CD8T_CD161pos_IkB	1.99E-05	0.000309431	-0.590089617	1	-0.000125176	decreasing with GA
511	Unstim_CD8T_CD161pos_pERK1.2	0.012331064	0.054719095	0.370116552	1	0.12705413	increasing with GA
512	Unstim_CD8T_CD161pos_pNFkB	0.097791435	0.243336163	-0.249909448	56	-0.162589688	decreasing with GA
513	Unstim_CD8T_CD161pos_pSTAT6	0.201795454	0.37970346	0.193927094	2	-0.090310918	increasing with GA
514	Unstim_CD8T_CM_PD1	0.994512056	0.994512056	0.001055027	13	-0.055819903	increasing with GA
515	Unstim_CD8T_CM_pNFkB	0.017125705	0.069349339	-0.353763638	1	-0.367897491	decreasing with GA
516	Unstim_CD8T_CM_pSTAT6	0.015861548	0.065478424	0.357654049	1	0.320679594	increasing with GA
517	Unstim_CD8T_EM_PD1	0.42420541	0.605601557	0.12211934	3	-0.067193264	increasing with GA
518	Unstim_CD8T_EM_pERK1.2	0.066861882	0.184008318	0.275625724	38	0.118997596	increasing with GA
519	Unstim_CD8T_EM_pNFkB	0.015923861	0.065478424	-0.357456231	23	-0.118457675	decreasing with GA
520	Unstim_CD8T_EMRA_pERK1.2	0.039602567	0.126803464	0.307935916	2	0.064363273	increasing with GA
521	Unstim_CD8T_EMRA_pNFkB	0.008438948	0.041774153	-0.388052006	65	-0.141201239	decreasing with GA
522	Unstim_CD8T_EMRA_pSTAT5	0.978050727	0.985453192	-0.004220107	2	0.163041505	decreasing with GA
523	Unstim_CD8T_EMRA_pSTAT6	0.046701686	0.145006693	0.29811098	2	0.015854658	increasing with GA
524	Unstim_CD8T_pERK1.2	0.000153766	0.001689773	0.534832594	21	0.11183293	increasing with GA
525	Unstim_CD8T_pNFkB	0.169713125	0.34379614	-0.208301833	2	0.00186248	decreasing with GA
526	Unstim_CD8Tnaive_IkB	2.58E-06	7.77E-05	-0.636708609	23	-0.342309643	decreasing with GA
527	Unstim_CD8Tnaive_pCREB	7.56E-06	0.000147859	-0.613102387	4	-0.031961929	decreasing with GA
528	Unstim_CD8Tnaive_PD1	0.721359544	0.809709705	-0.054663571	5	-0.038324152	decreasing with GA
529	Unstim_CD8Tnaive_pERK1.2	0.000584295	0.005329019	0.492763405	54	0.110911123	increasing with GA
530	Unstim_CD8Tnaive_pNFkB	0.094631212	0.23657803	-0.252217319	1	0.123047922	decreasing with GA
531	Unstim_CD8Tnaive_pSTAT3	0.636568582	0.743361338	0.07238072	5	-0.015389695	increasing with GA
532	Unstim_cMC_PD1	0.000585442	0.005329019	0.492697466	146	0.154301953	increasing with GA
533	Unstim_cMC_pERK1.2	0.176867971	0.354308754	-0.204937631	24	0.050245904	decreasing with GA
534	Unstim_cMC_pMAPKAPK2	2.68E-07	2.59E-05	-0.680690035	2	-0.35601587	decreasing with GA
535	Unstim_cMC_pP38	0.001317646	0.010167915	-0.46420697	2	-0.210282641	decreasing with GA
536	Unstim_cMC_pS6	0.000659303	0.005803413	-0.488675176	1	-0.263695867	decreasing with GA
537	Unstim_cMC_pSTAT5	0.348852866	0.538200045	0.142956117	2	2.123100334	increasing with GA
538	Unstim_DC_pCREB	0.000634215	0.005675954	-0.48999396	4	-0.408589832	decreasing with GA
539	Unstim_DC_PD1	0.373627634	0.558594963	0.135834687	24	0.024151344	increasing with GA
540	Unstim_DC_pMAPKAPK2	1.21E-07	2.29E-05	-0.69453726	5	-0.40195407	decreasing with GA
541	Unstim_DC_pNFkB	6.18E-05	0.000747863	-0.560680748	51	-0.161238016	decreasing with GA
542	Unstim_DC_pP38	0.011318789	0.051295788	-0.374252334	35	-0.107567322	decreasing with GA
543	Unstim_DC_pS6	0.000161846	0.00174107	-0.533315993	91	-0.196820531	decreasing with GA
544	Unstim_DC_pSTAT5	0.027086432	0.097786611	0.329498024	3	0.117819754	increasing with GA
545	Unstim_gdT_IkB	2.88E-06	8.19E-05	-0.634400738	5	-0.050609242	decreasing with GA
546	Unstim_gdT_PD1	5.68E-06	0.000123453	0.619564425	778	0.301322874	increasing with GA
547	Unstim_gdT_pERK1.2	0.002415844	0.016706975	0.441198975	43	0.187390287	increasing with GA
548	Unstim_gdT_pMAPKAPK2	4.77E-07	3.14E-05	-0.670139768	1	-0.340977851	decreasing with GA
549	Unstim_gdT_pNFkB	0.05538216	0.164227829	-0.287626652	5	-0.105267025	decreasing with GA
550	Unstim_gdT_pSTAT3	0.420804225	0.6039845	0.123011082	2	1.236377913	increasing with GA
551	Unstim_gdT_pSTAT5	0.588301064	0.709474073	-0.082885535	1	0.226815341	decreasing with GA
552	Unstim_gdT_pSTAT6	0.55161396	0.68527582	0.091127931	2	-0.198725546	increasing with GA
553	Unstim_Granulocytes_pCREB	0.020599279	0.079199394	-0.344202459	3	-0.092089896	decreasing with GA
554	Unstim_Granulocytes_pERK1.2	0.469778884	0.646401178	0.110534045	48	0.148840863	increasing with GA
555	Unstim_Granulocytes_pMAPKAPK2	0.000288231	0.0029516	-0.515710235	17	-0.15848002	decreasing with GA
556	Unstim_Granulocytes_pNFkB	0.639555568	0.746031413	-0.071741815	2	0.048708497	decreasing with GA
557	Unstim_Granulocytes_pP38	0.881186006	0.925772758	0.022923213	26	0.087057118	increasing with GA
558	Unstim_Granulocytes_pS6	0.256249779	0.443325098	-0.17282656	4	-0.097625095	decreasing with GA
559	Unstim_Granulocytes_pSTAT3	0.000155491	0.001689773	0.534502898	26	0.093831657	increasing with GA
560	Unstim_Granulocytes_pSTAT5	0.015249711	0.063851344	0.359632224	8	0.869725165	increasing with GA
561	Unstim_HLADRhighmDC_PD1	0.00019773	0.002084973	0.527315529	125	0.123812737	increasing with GA
562	Unstim_HLADRhighmDC_pNFkB	4.00E-05	0.000519773	-0.572286042	1	-0.016780618	decreasing with GA
563	Unstim_HLADRhighmDC_pP38	0.000584382	0.005329019	-0.492758426	16	-0.107419213	decreasing with GA
564	Unstim_HLADRhighmDC_pS6	0.000779111	0.006382713	-0.482938469	17	-0.275656189	decreasing with GA
565	Unstim_HLADRhighmDC_pSTAT3	0.022421923	0.084678539	0.339718595	5	0.002338518	increasing with GA
566	Unstim_HLADRlowmDC_PD1	0.054569247	0.162335887	0.288549801	26	0.082208783	increasing with GA
567	Unstim_HLADRlowmDC_pMAPKAPK2	8.36E-06	0.00015084	-0.610794516	37	-0.294307364	decreasing with GA
568	Unstim_HLADRlowmDC_pNFkB	0.006061139	0.032838135	-0.402954258	3	0.067671175	decreasing with GA
569	Unstim_HLADRlowmDC_pP38	0.015348304	0.063851344	-0.359308955	1	0.337945556	decreasing with GA
570	Unstim_HLADRlowmDC_pS6	0.000526348	0.005050095	-0.496258181	62	-0.165329483	decreasing with GA
571	Unstim_HLADRlowmDC_pSTAT3	0.000253866	0.002650663	0.519666585	36	0.089645633	increasing with GA
572	Unstim_intMC_IkB	0.000667002	0.005803413	-0.488279541	7	-0.138808692	decreasing with GA
573	Unstim_intMC_PD1	0.005371852	0.030593704	0.408229391	240	0.116197088	increasing with GA
574	Unstim_intMC_pERK1.2	0.217382729	0.397787984	-0.187522389	13	-0.082269377	decreasing with GA
575	Unstim_intMC_pMAPKAPK2	1.43E-07	2.29E-05	-0.691701876	10	-0.441995253	decreasing with GA
576	Unstim_intMC_pNFkB	7.20E-06	0.000147859	-0.614223353	2	-0.056483279	decreasing with GA
577	Unstim_intMC_pP38	0.000842101	0.006846085	-0.480232836	124	-0.221038371	decreasing with GA
578	Unstim_intMC_pS6	0.000699952	0.005869679	-0.486631062	53	-0.120816397	decreasing with GA
579	Unstim_intMC_pSTAT5	0.111959583	0.262636467	0.24021639	15	3.871806082	increasing with GA
580	Unstim_mDC_PD1	0.008475271	0.041774153	0.387854188	27	0.126067537	increasing with GA
581	Unstim_mDC_pNFkB	0.000757158	0.006250956	-0.483927556	1	0.046239485	decreasing with GA
582	Unstim_mDC_pP38	0.002576953	0.017369967	-0.438652654	1	-0.200894104	decreasing with GA
583	Unstim_mDC_pS6	0.000686601	0.005803413	-0.487290454	7	-0.15728705	decreasing with GA
584	Unstim_mDC_pSTAT3	0.001554882	0.01149965	0.458079402	2	0.074902554	increasing with GA
585	Unstim_ncMC_IkB	0.002914177	0.018924381	-0.433747849	153	-0.274586998	decreasing with GA
586	Unstim_ncMC_pCREB	9.34E-09	4.40E-06	-0.734430457	394	-0.302977079	decreasing with GA
587	Unstim_ncMC_PD1	0.912262102	0.942518783	0.016899921	23	-0.1184583	increasing with GA
588	Unstim_ncMC_pMAPKAPK2	2.27E-06	7.32E-05	-0.639412115	23	-0.186676467	decreasing with GA
589	Unstim_ncMC_pNFkB	2.18E-05	0.000319481	-0.587781746	96	-0.157202978	decreasing with GA
590	Unstim_ncMC_pP38	0.001259299	0.009861419	-0.465863873	88	-0.184279237	decreasing with GA
591	Unstim_ncMC_pS6	0.027610858	0.098676388	-0.328442997	17	-0.095576223	decreasing with GA
592	Unstim_ncMC_pSTAT3	0.033103888	0.11192267	0.318288365	1	0.188031506	increasing with GA
593	Unstim_NK_pCREB	0.001445901	0.010844258	-0.460782908	1	-0.000106504	decreasing with GA
594	Unstim_NK_pMAPKAPK2	1.10E-06	5.11E-05	-0.654050611	3	-0.054045972	decreasing with GA
595	Unstim_NK_pNFkB	0.005487303	0.030920519	-0.407306243	5	-0.093520401	decreasing with GA
596	Unstim_NKT_pCREB	0.000665713	0.005803413	-0.488345481	3	-0.022616755	decreasing with GA
597	Unstim_NKT_pERK1.2	0.886152816	0.927977138	-0.021958466	9	0.014034782	decreasing with GA
598	Unstim_NKT_pMAPKAPK2	1.68E-07	2.29E-05	-0.688932431	4	-0.002352943	decreasing with GA
599	Unstim_NKT_pNFkB	0.002630587	0.017619972	-0.437836078	5	-0.084537507	decreasing with GA
600	Unstim_NKT_pSTAT5	0.147011846	0.316938494	-0.219709309	11	-0.369331491	decreasing with GA
601	Unstim_NKT_pSTAT6	0.631860267	0.741113639	0.073390294	1	-0.083329661	increasing with GA
602	Unstim_pDC_IkB	0.000709979	0.005907248	-0.491199862	10	-0.179956862	decreasing with GA
603	Unstim_pDC_pCREB	0.00201834	0.01433021	-0.452964859	35	-0.212761294	decreasing with GA
604	Unstim_pDC_PD1	0.020434994	0.078852423	0.348488772	40	0.099634196	increasing with GA
605	Unstim_pDC_pMAPKAPK2	0.002044185	0.014417599	-0.452471049	19	-0.126077536	decreasing with GA
606	Unstim_pDC_pNFkB	0.023618964	0.087645286	-0.3407289	18	-0.20363647	decreasing with GA
607	Unstim_pDC_pP38	0.059012965	0.171250158	-0.286884651	64	-0.226536081	decreasing with GA
608	Unstim_pDC_pS6	0.027485296	0.098558386	-0.332404675	18	-0.050087798	decreasing with GA
609	Unstim_pDC_pSTAT5	0.048402797	0.148556135	0.299319405	4	0.051302605	increasing with GA
